# Supplementary material
Source: publisher figshare collection journal article supplement (https://aacr.figshare.com/articles/dataset/_/22539715)
Supplement: Supplementary file 1 [file 40003039]

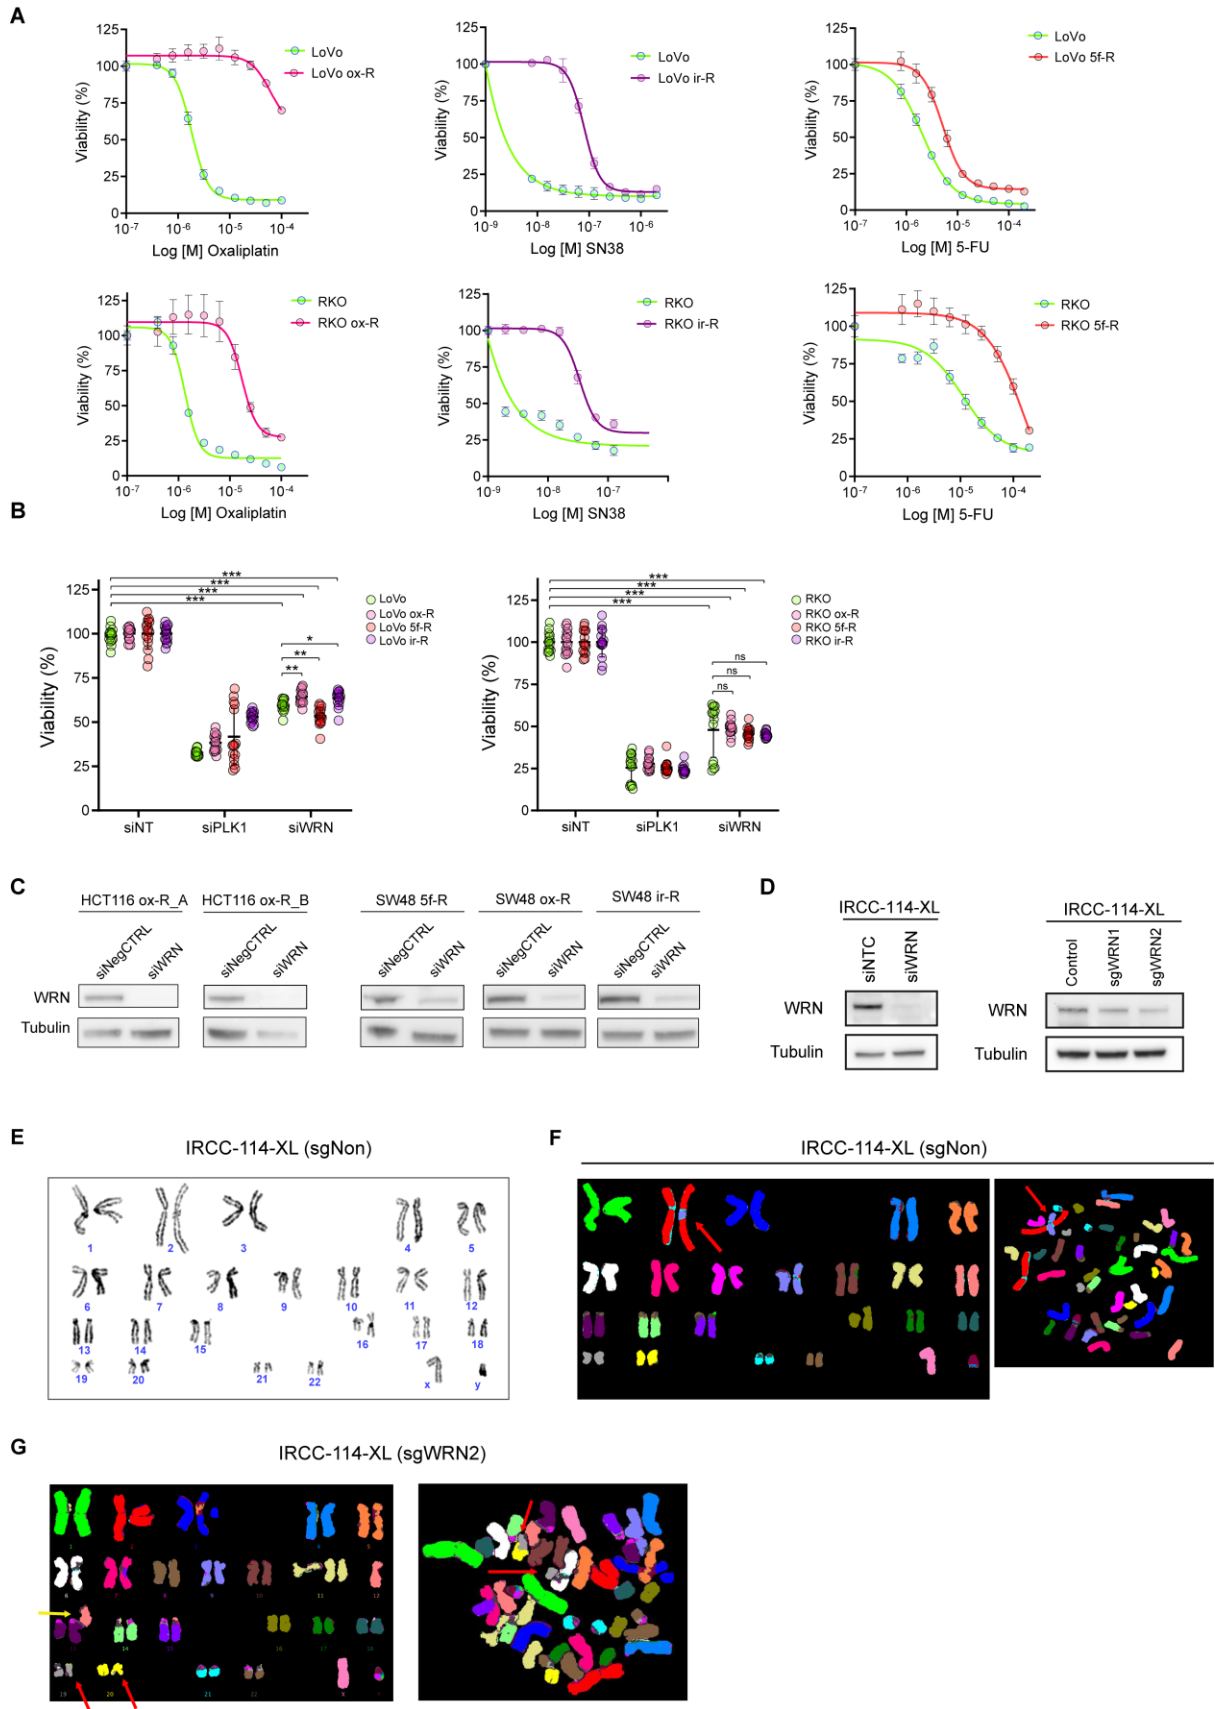

**Supplementary Figure S4: Validation experiments in chemotherapy resistant models and IRCC-114\_XL cells following WRN depletion. A, Proliferation assays in Lovo and RKO**

models of acquired resistance to chemotherapies and parental counterparts. Data are average  $\pm$  SD of three technical replicates and are representative of three independent experiments. **B**, Normalized viability of upon siRNA-mediated WRN depletion in LoVo and RKO chemotherapy-resistant sublines. Non-targeting siRNA (siNT) and siPLK1 were used as negative and positive controls, respectively. Data are mean and SD of 2 independent experiments with 4 technical replicates each. Statistical significance was evaluated using a Student's t-test: ns, not significant; \*\*  $P \leq 0.01$  \*\*\*  $P \leq 0.001$ . **C-D** Reduction in WRN protein levels in HCT116 and SW48 sublines and IRCC-114-XL cells confirmed by Western blot after siRNA-mediated depletion of WRN (left) or with two WRN-targeting sgRNAs (right) (representative of two independent experiments). **E**, Representative image of an IRCC-114-XL metaphase harvested 96h after transduction with non-targeting sgRNA (sgNon), karyotyped based on DAPI-banding patterns and visualized by microscopy. No chromosomal defects were detected. **F** and **G**, Metaphases of IRCC-114-XL cell line transduced with non-targeting sgRNA (F) and WRN-targeting sgRNA (G). Overlaps and complex rearrangements are indicated by red and yellow arrows, respectively. Metaphases have been imaged using SmartCapture and karyotyped using SmartType Karyotyper based on M-FISH and DAPI banding patterns.
